# Supplementary material for: Two Keggin sandwich-type tungstophosphates modified by open-chain carboxyethyltin groups and transition metals
Source: Royal Society of Chemistry journal article supplement (doi:10.1039/c5ra07419c), 2015-01-01
Supplement: c5ra07419c1.pdf [file c5ra07419c1.pdf]

## **Supporting Information**

# **Two Keggin sandwich-type tungstophosphates modified by open chain carboxyethyltin groups and transition metals**

**Bai Zhang,<sup>a</sup> Lan-Cui Zhang,<sup>\*a</sup> Ya-Jun Zhang,<sup>a</sup> Fang Su,<sup>a,b</sup> Wan-Sheng You<sup>\*a</sup> and Zai-Ming Zhu<sup>\*a</sup>**

- 1. Crystal structure figures**
- 2. Selected bond lengths and angles of compounds 1 and 2**
- 3. Physical characterizations**
- 4. Catalytic activity tests**

## 1. Crystal structure figures

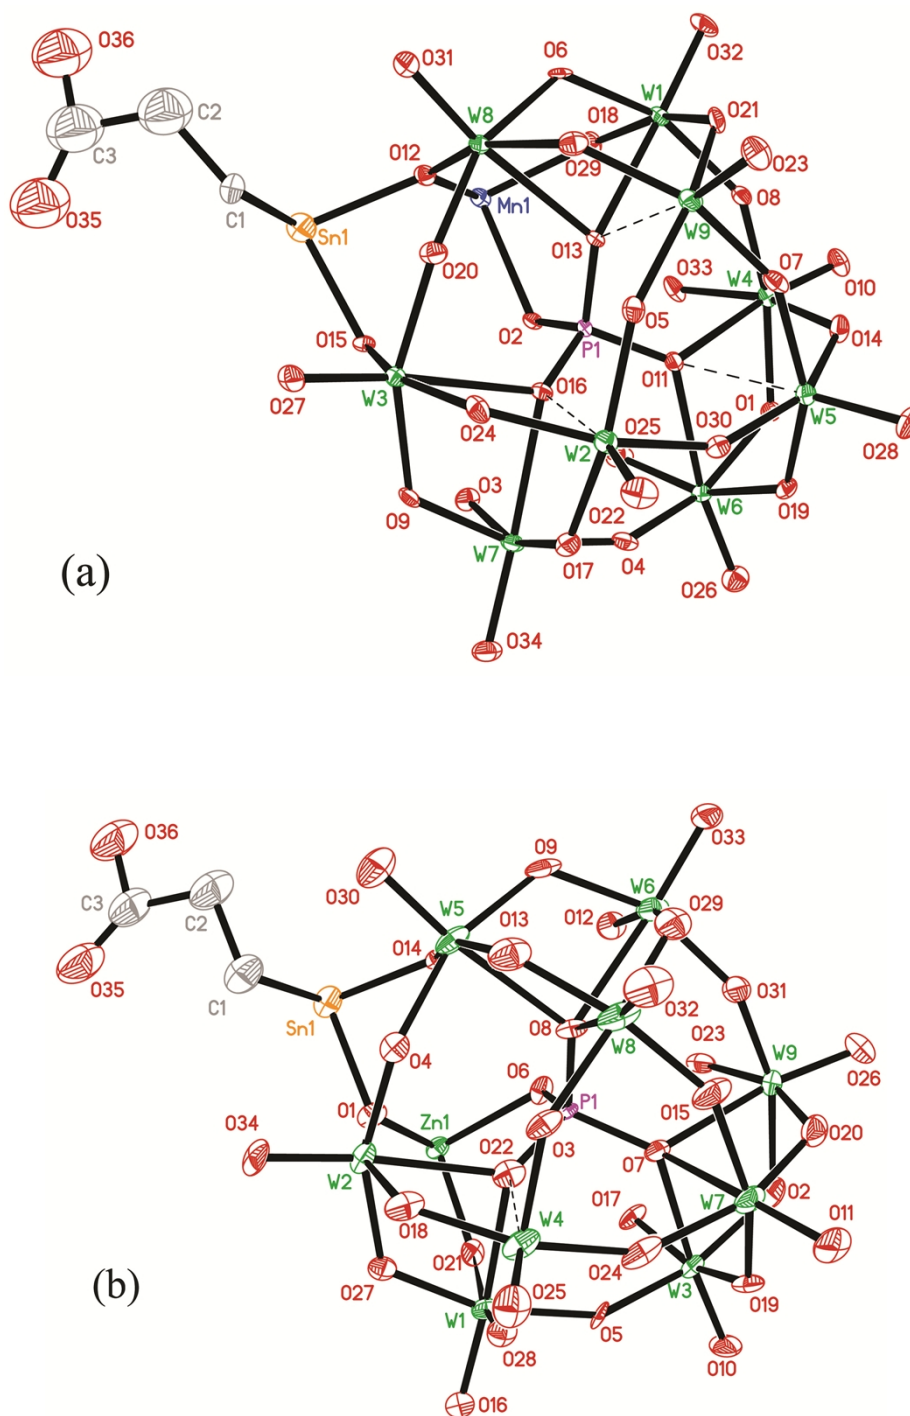

**Fig. S1** ORTEP drawing of the polyoxoanions of **1** (a) and **2** (b) with thermal ellipsoids at 30 % probability (H, K, Na atoms, and free water molecules have been omitted for clarity)

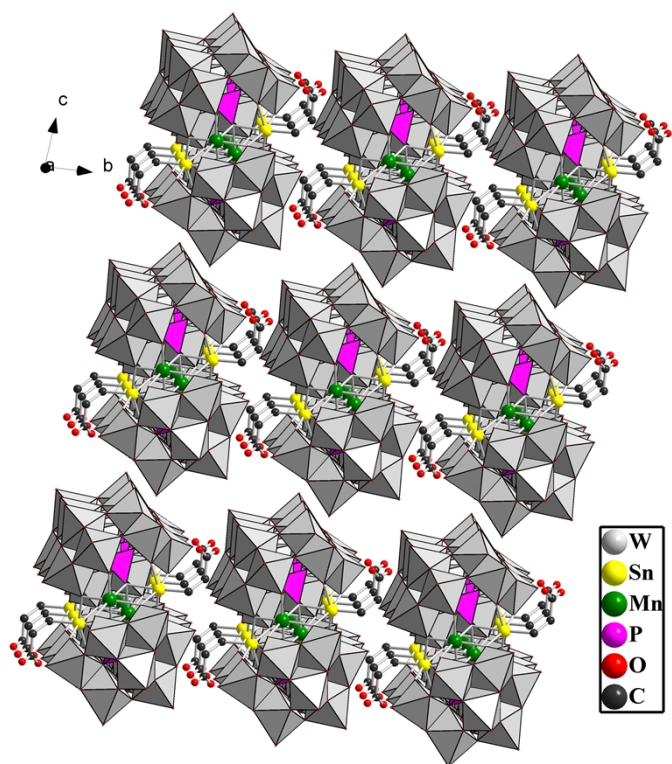

(a)

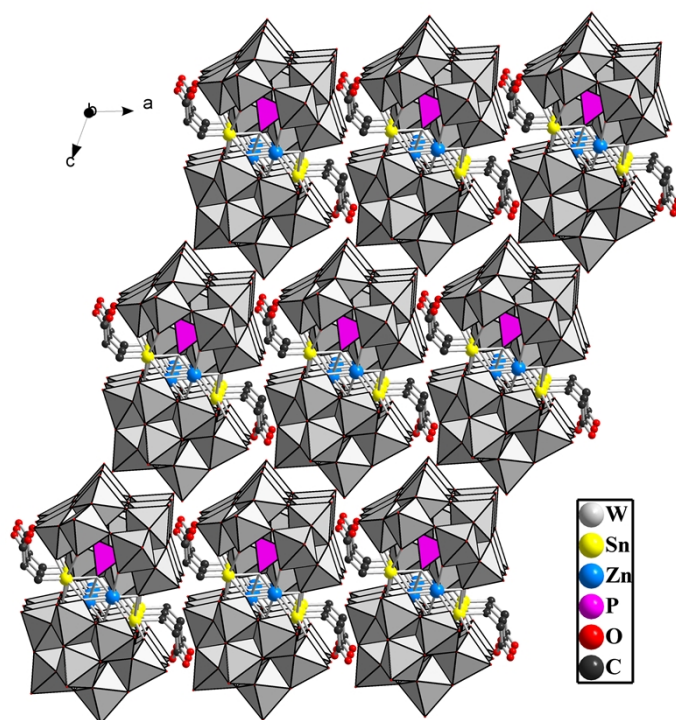

(b)

**Fig. S2** Polyhedral and ball-and-stick view of the 3D supramolecular framework of **1** (a) and **2** (b). The H, Na, K and water molecules reside in the interspaces of the adjacent polyoxoanions are omitted for clarity

## 2. Selected bond lengths and angles of compounds 1 and 2

**Table S1** Selected bond lengths (Å) and angles (°) for compound 1

| Bond       | Length(Å) | Bond       | Length(Å) | Bond            | Length(Å) |
|------------|-----------|------------|-----------|-----------------|-----------|
| W1-O32     | 1.706(10) | W5-O14     | 1.880(10) | W9-O5           | 1.905(10) |
| W1-O18     | 1.782(10) | W5-O7      | 1.930(10) | W9-O13          | 2.601(10) |
| W1-O8      | 1.887(10) | W5-O30     | 1.932(10) | P1-O13          | 1.535(9)  |
| W1-O6      | 1.975(10) | W5-O11     | 2.535(10) | P1-O2           | 1.541(9)  |
| W1-O21     | 2.019(10) | W6-O26     | 1.719(11) | P1-O16          | 1.546(10) |
| W1-O13     | 2.430(9)  | W6-O25     | 1.800(10) | P1-O11          | 1.546(10) |
| W2-O22     | 1.730(10) | W6-O1      | 1.926(10) | Sn1-O33#1       | 2.070(10) |
| W2-O17     | 1.874(10) | W6-O4      | 1.946(10) | Sn1-O25#1       | 2.074(10) |
| W2-O24     | 1.895(10) | W6-O19     | 1.983(10) | Sn1-C1          | 2.155(13) |
| W2-O30     | 1.897(10) | W6-O11     | 2.449(9)  | Sn1-O12         | 2.125(10) |
| W2-O5      | 1.929(10) | W7-O34     | 1.714(10) | Sn1-O15         | 2.134(9)  |
| W2-O16     | 2.574(10) | W7-O3      | 1.777(9)  | Sn1-O2#1        | 2.403(9)  |
| W3-O27     | 1.703(10) | W7-O4      | 1.889(10) | Mn1-O18         | 2.052(10) |
| W3-O15     | 1.885(9)  | W7-O9      | 1.983(10) | Mn1-O3#1        | 2.071(10) |
| W3-O9      | 1.894(9)  | W7-O17     | 1.996(10) | Mn1-O15#1       | 2.164(9)  |
| W3-O20     | 1.936(10) | W7-O16     | 2.424(9)  | Mn1-O12         | 2.166(10) |
| W3-O24     | 1.967(10) | W8-O31     | 1.720(10) | Mn1-O2          | 2.324(9)  |
| W3-O16     | 2.436(10) | W8-O12     | 1.881(10) | Mn1-O2#1        | 2.328(9)  |
| W4-O10     | 1.711(10) | W8-O6      | 1.900(9)  | C1-C2           | 1.535(10) |
| W4-O33     | 1.813(10) | W8-O20     | 1.901(10) | C2-C3           | 1.526(10) |
| W4-O1      | 1.920(9)  | W8-O29     | 1.953(10) | C3-O35          | 1.254(10) |
| W4-O8      | 1.949(9)  | W8-O13     | 2.436(9)  | C3-O36          | 1.255(10) |
| W4-O14     | 1.992(10) | W9-O23     | 1.707(10) |                 |           |
| W4-O11     | 2.416(9)  | W9-O21     | 1.873(10) |                 |           |
| W5-O28     | 1.715(10) | W9-O29     | 1.888(10) |                 |           |
| W5-O19     | 1.878(9)  | W9-O7      | 1.904(10) |                 |           |
| Bond       | Angle(°)  | Bond       | Angle(°)  | Bond            | Angle(°)  |
| O32-W1-O18 | 102.8(5)  | O10-W4-O14 | 99.9(5)   | O6-W8-O20       | 156.7(4)  |
| O18-W1-O6  | 89.6(4)   | O14-W4-O11 | 72.9(4)   | O12-W8-O20      | 88.3(4)   |
| O8-W1-O6   | 153.9(4)  | O28-W5-O19 | 102.0 (5) | O31-W8-O13      | 171.7(4)  |
| O8-W1-O21  | 85.1(4)   | O19-W5-O14 | 89.9(4)   | O6-W8-O13       | 72.7(3)   |
| O32-W1-O13 | 170.2(4)  | O19-W5-O7  | 155.9(4)  | O23-W9-O21      | 102.3(5)  |
| O22-W2-O17 | 102.2(5)  | O14-W5-O30 | 154.8(4)  | O29-W9-O7       | 155.4(4)  |
| O17-W2-O30 | 88.5(4)   | O7-W5-O30  | 84.1(4)   | O29-W9-O5       | 86.2(4)   |
| O24-W2-O30 | 155.5(4)  | O26-W6-O25 | 105.0(5)  | O7-W9-O5        | 85.5(4)   |
| O17-W2-O5  | 154.8(4)  | O26-W6-O19 | 99.7(4)   | O21-W9-O5       | 154.5(4)  |
| O24-W2-O5  | 86.7(4)   | O25-W6-O19 | 155.2(4)  | O33#1-Sn1-O25#1 | 92.7(4)   |

|            |          |            |          |               |          |
|------------|----------|------------|----------|---------------|----------|
| O27-W3-O15 | 101.7(5) | O4-W6-O19  | 85.0(4)  | O33#1-Sn1-O12 | 159.9(4) |
| O15-W3-O9  | 92.8(4)  | O26-W6-O11 | 171.2(4) | O12-Sn1-O15   | 83.2(4)  |
| O15-W3-O16 | 84.9(4)  | O34-W7-O3  | 103.7(5) | O33#1-Sn1-C1  | 95.3(5)  |
| O27-W3-O16 | 172.2(4) | O4-W7-O9   | 155.3(4) | O12-Sn1-C1    | 104.2(5) |
| O24-W3-O16 | 74.3(4)  | O34-W7-O16 | 168.4(4) | C1-Sn1-O2#1   | 176.0(4) |
| O10-W4-O33 | 104.5(5) | O9-W7-O16  | 71.8(3)  | O13-P1-O16    | 109.2(5) |
| O1-W4-O8   | 156.3(4) | O3-W7-O9   | 88.8(4)  | O2-P1-O16     | 111.2(5) |
| O1-W4-O14  | 82.3(4)  | O31-W8-O12 | 101.9(4) | O16-P1-O11    | 108.2(5) |

Symmetry transformations used to generate equivalent atoms: #1 -x,-y+1,-z+1

**Table S2** Selected bond lengths (Å) and angles (°) for compound **2**

| Bond       | Length(Å)  | Bond      | Length(Å) | Bond       | Length(Å) |
|------------|------------|-----------|-----------|------------|-----------|
| W1-O16     | 1.73 (2)   | W5-O14    | 1.877(17) | W9-O31     | 1.92(2)   |
| W1-O21     | 1.77(2)    | W5-O9     | 1.88(2)   | W9-O2      | 1.93(2)   |
| W1-O27     | 1.90(2)    | W5-O4     | 1.930(17) | W9-O20     | 1.99(2)   |
| W1-O5      | 1.917(16)  | W5-O13    | 1.96(2)   | W9-O7      | 2.408(17) |
| W1-O28     | 2.017(19)  | W5-O8     | 2.40(2)   | P1-O22     | 1.54(2)   |
| W1-O22     | 2.425(18)  | W6-O33    | 1.73(2)   | P1-O6      | 1.542(19) |
| W2-O34     | 1.719(19)  | W6-O12    | 1.774(19) | P1-O8      | 1.595(19) |
| W2-O1      | 1.882(17)  | W6-O31    | 1.91(2)   | P1-O7      | 1.596(19) |
| W2-O4      | 1.929(18)  | W6-O9     | 1.97(2)   | Sn1-O17#1  | 2.00(2)   |
| W2-O27     | 1.938 (19) | W6-O29    | 1.99(2)   | Sn1-O23#1  | 2.017(18) |
| W2-O18     | 1.97(2)    | W6-O8     | 2.383(18) | Sn1-C1     | 2.10(2)   |
| W2-O22     | 2.39(2)    | W7-O11    | 1.74(2)   | Sn1-O14    | 2.105(15) |
| W3-O10     | 1.707(19)  | W7-O20    | 1.88(2)   | Sn1-O1     | 2.12(2)   |
| W3-O17     | 1.823(19)  | W7-O19    | 1.903(18) | Sn1-O6#1   | 2.321(17) |
| W3-O2      | 1.868 (19) | W7-O15    | 1.91(2)   | Zn1-O21    | 2.00(2)   |
| W3-O5      | 1.919(16)  | W7-O24    | 1.97(2)   | Zn1-O12#1  | 2.021(18) |
| W3-O19     | 2.00(2)    | W7-O7     | 2.480(19) | Zn1-O1     | 2.068(17) |
| W3-O7      | 2.381 (17) | W8-O32    | 1.720(2)  | Zn1-O14#1  | 2.083(16) |
| W4-O25     | 1.72(2)    | W8-O13    | 1.90(3)   | Zn1-O6#1   | 2.24(2)   |
| W4-O24     | 1.87(2)    | W8-O15    | 1.91(2)   | Zn1-O6     | 2.287(17) |
| W4-O18     | 1.89(2)    | W8-O29    | 1.92(2)   | C1-C2      | 1.501(10) |
| W4-O28     | 1.888(18)  | W8-O3     | 1.96(2)   | C2-C3      | 1.503(10) |
| W4-O3      | 1.899(19)  | W8-O8     | 2.49(2)   | C3-O35     | 1.251(10) |
| W4-O22     | 2.574(19)  | W9-O26    | 1.73(2)   | C3-O36     | 1.259(10) |
| W5-O30     | 1.69(2)    | W9-O23    | 1.82(2)   |            |           |
| Bond       | Angle(°)   | Bond      | Angle(°)  | Bond       | Angle(°)  |
| O16-W1-O21 | 103.0(10)  | O18-W4-O3 | 86.0(8)   | O13-W8-O15 | 156.5(9)  |
| O21-W1-O27 | 88.6(8)    | O28-W4-O3 | 156.7(8)  | O13-W8-O29 | 89.0(11)  |

|            |           |            |           |                 |           |
|------------|-----------|------------|-----------|-----------------|-----------|
| O27-W1-O5  | 157.0(7)  | O30-W5-O14 | 103.7(10) | O32-W8-O8       | 170.1(9)  |
| O16-W1-O5  | 99.8(9)   | O14-W5-O9  | 90.2(7)   | O13-W8-O8       | 72.7(8)   |
| O16-W1-O22 | 171.5(9)  | O9-W5-O4   | 157.5(8)  | O26-W9-O23      | 104.2(12) |
| O34-W2-O1  | 103.1(10) | O9-W5-O8   | 73.1(7)   | O23-W9-O31      | 92.0(9)   |
| O1-W2-O4   | 88.8(8)   | O30-W5-O8  | 170.4(9)  | O2-W9-O20       | 82.5(8)   |
| O4-W2-O27  | 155.8(8)  | O33-W6-O12 | 104.1(12) | O26-W9-O7       | 170.8(11) |
| O34-W2-O22 | 173.2(9)  | O12-W6-O31 | 93.2(10)  | O2-W9-O7        | 71.9(6)   |
| O1-W2-O22  | 82.1(7)   | O31-W6-O9  | 154.9(9)  | O17#1-Sn1-O23#1 | 93.4(8)   |
| O10-W3-O17 | 102.3(11) | O31-W6-O29 | 86.4(10)  | O17#1-Sn1-O14   | 89.3(7)   |
| O17-W3-O2  | 90.6(9)   | O33-W6-O8  | 167.9(11) | O23#1-Sn1-O14   | 164.7(7)  |
| O2-W3-O19  | 83.1(8)   | O11-W7-O20 | 101.5(10) | O23#1-Sn1-C1    | 94.2(10)  |
| O10-W3-O7  | 174.4(9)  | O20-W7-O19 | 89.8(8)   | O17#1-Sn1-C1    | 93.7(9)   |
| O19-W3-O7  | 73.2(7)   | O19-W7-O15 | 155.9(9)  | C1-Sn1-O14      | 100.6(9)  |
| O25-W4-O24 | 102.1(10) | O11-W7-O7  | 170.2(9)  | O22-P1-O7       | 107.9(11) |
| O24-W4-O18 | 157.4(9)  | O20-W7-O7  | 73.0(7)   | O6-P1-O7        | 111.7(10) |
| O24-W4-O28 | 88.4 (8)  | O32-W8-O13 | 99.9(11)  | O8-P1-O7        | 107.1(10) |

---

Symmetry transformations used to generate equivalent atoms: #1 -x+1,-y+1,-z+1

### 3. Physical characterizations

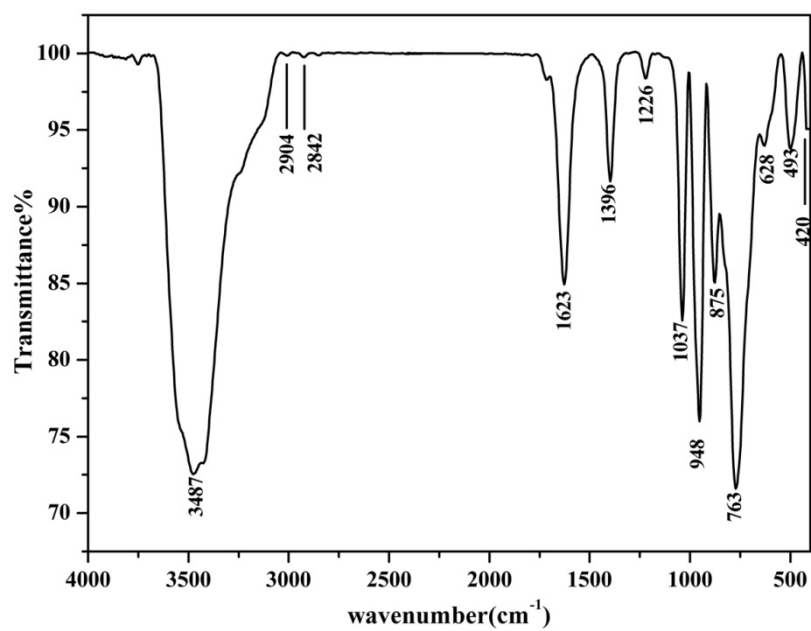

Fig. S3 IR spectrum of compound 1

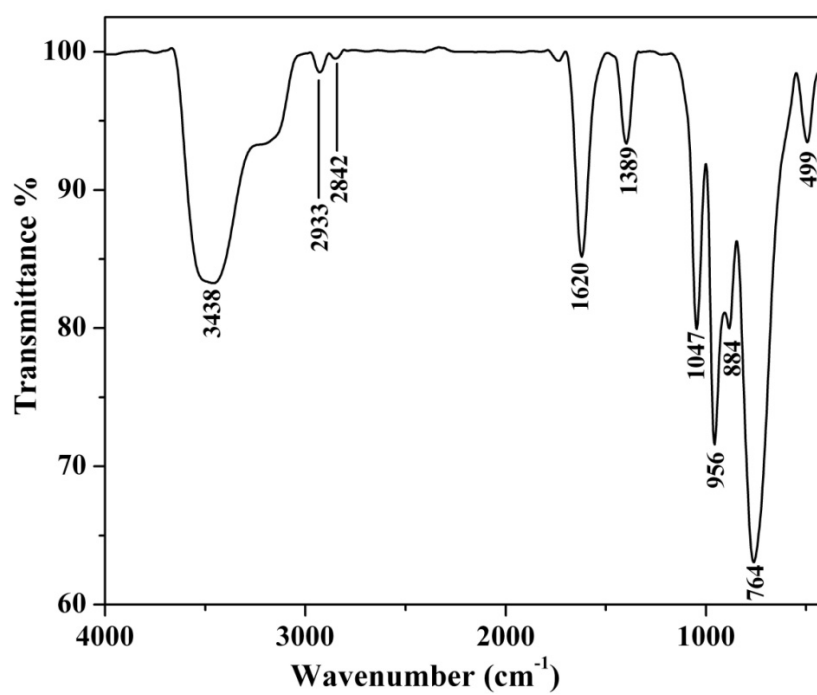

Fig. S4 IR spectrum of compound 2

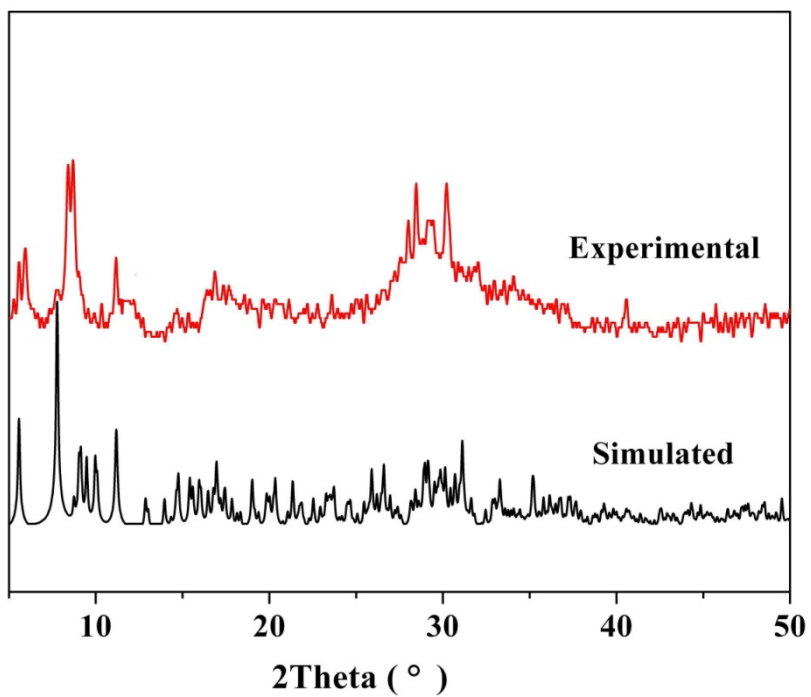

**Fig. S5** The simulated and experimental XRD patterns of compound 1

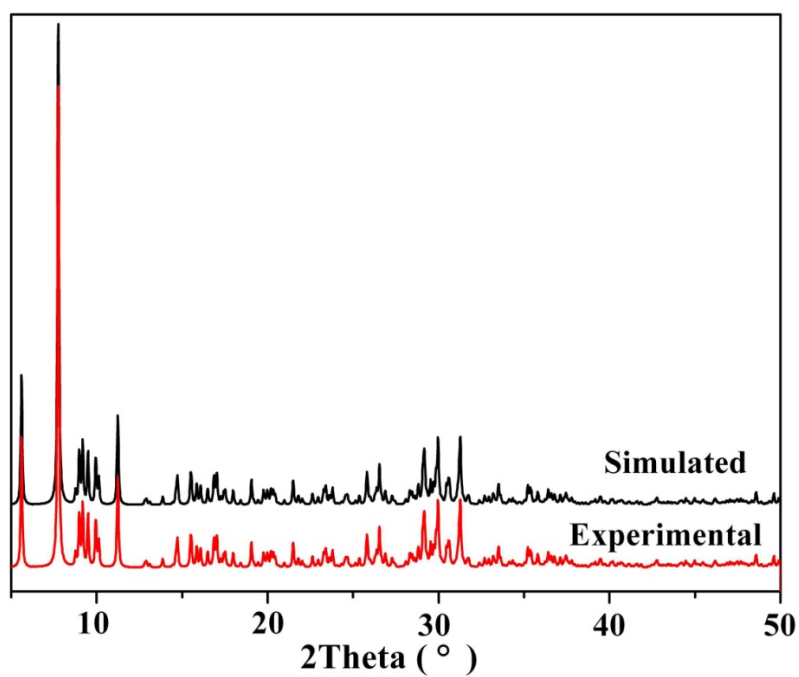

**Fig. S6** The simulated and experimental XRD patterns of compound 2



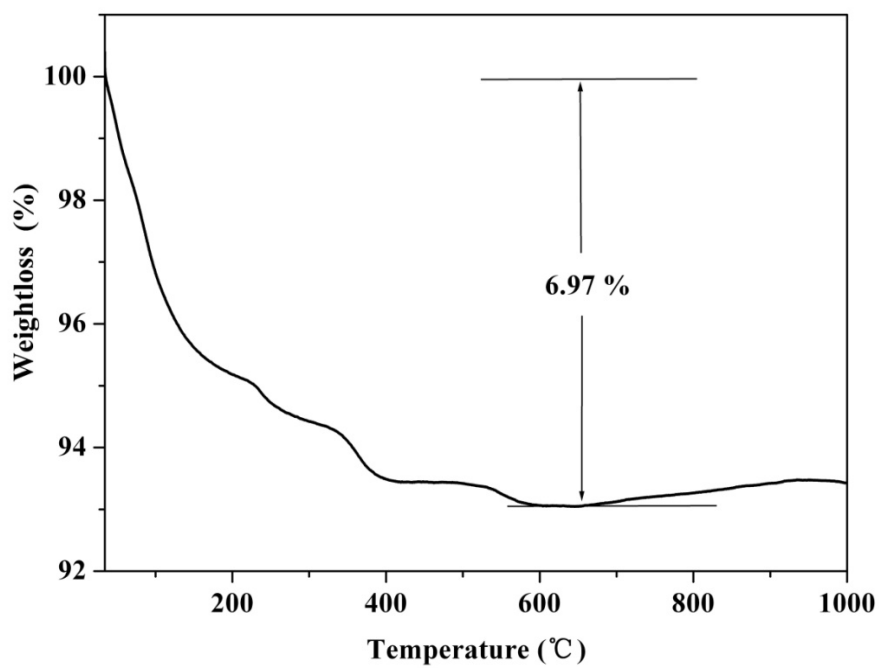

Fig. S7 TG curve of 1

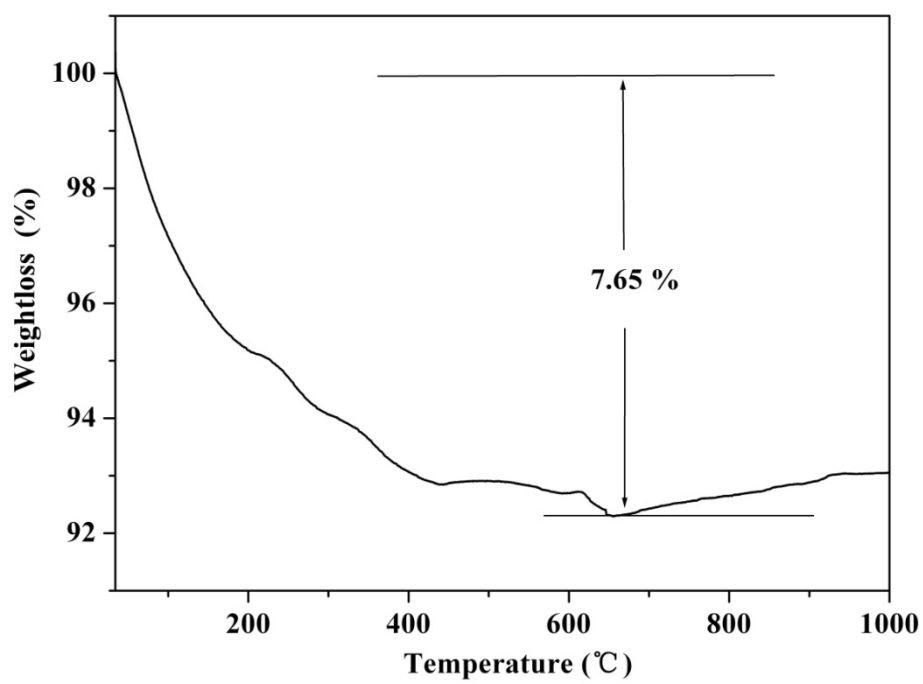

Fig. S8 TG curve of 2

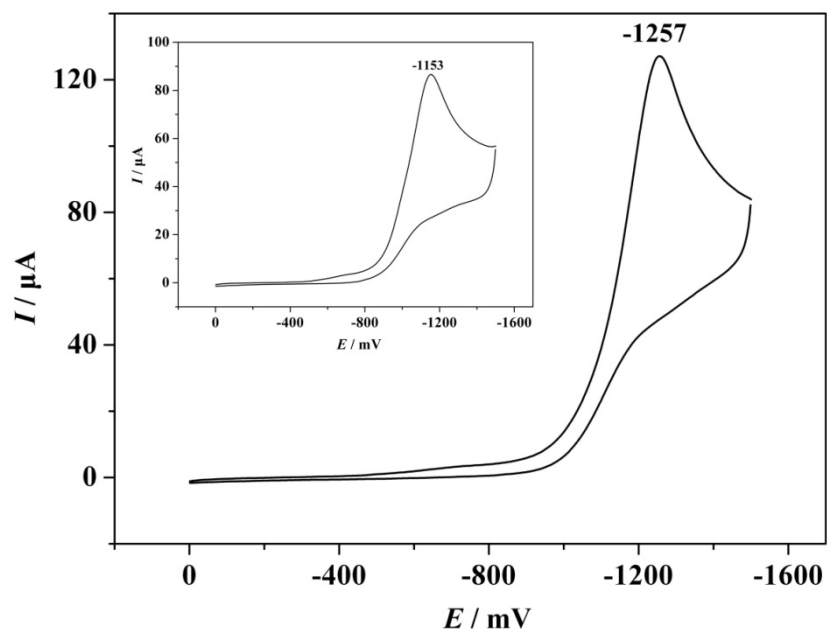

**Fig. S9** Cyclic voltammogram of  $\text{PW}_9\text{-Mn}$  (the inset) and compound **1** in pH = 3 ( $0.1 \text{ mol L}^{-1} \text{ Na}_2\text{SO}_4\text{-H}_2\text{SO}_4$ ) solution

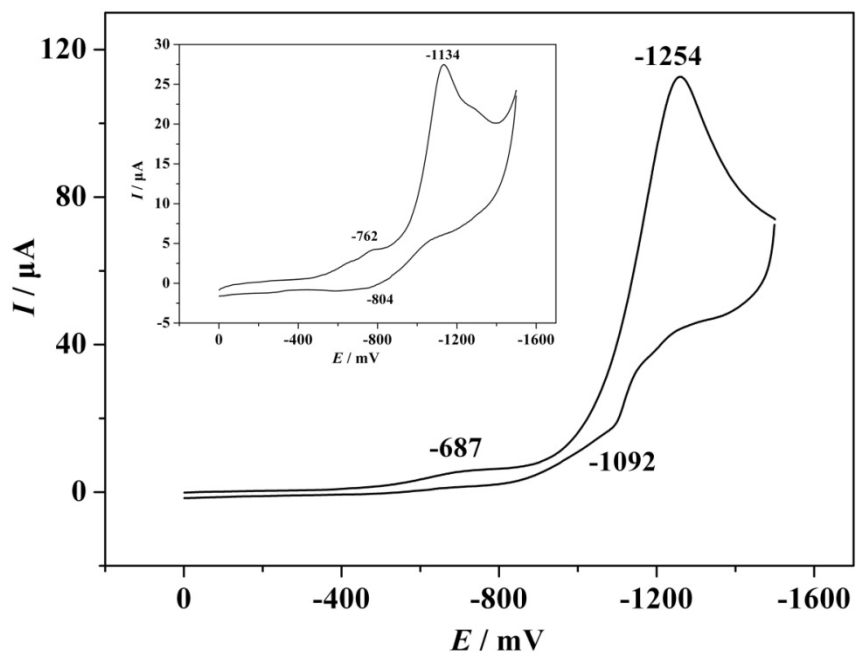

**Fig. S10** Cyclic voltammogram of  $\text{PW}_9\text{-Zn}$  (the inset) and compound **2** in pH = 3 ( $0.1 \text{ mol L}^{-1} \text{ Na}_2\text{SO}_4\text{-H}_2\text{SO}_4$ ) solution

### 3. Catalytic activity tests

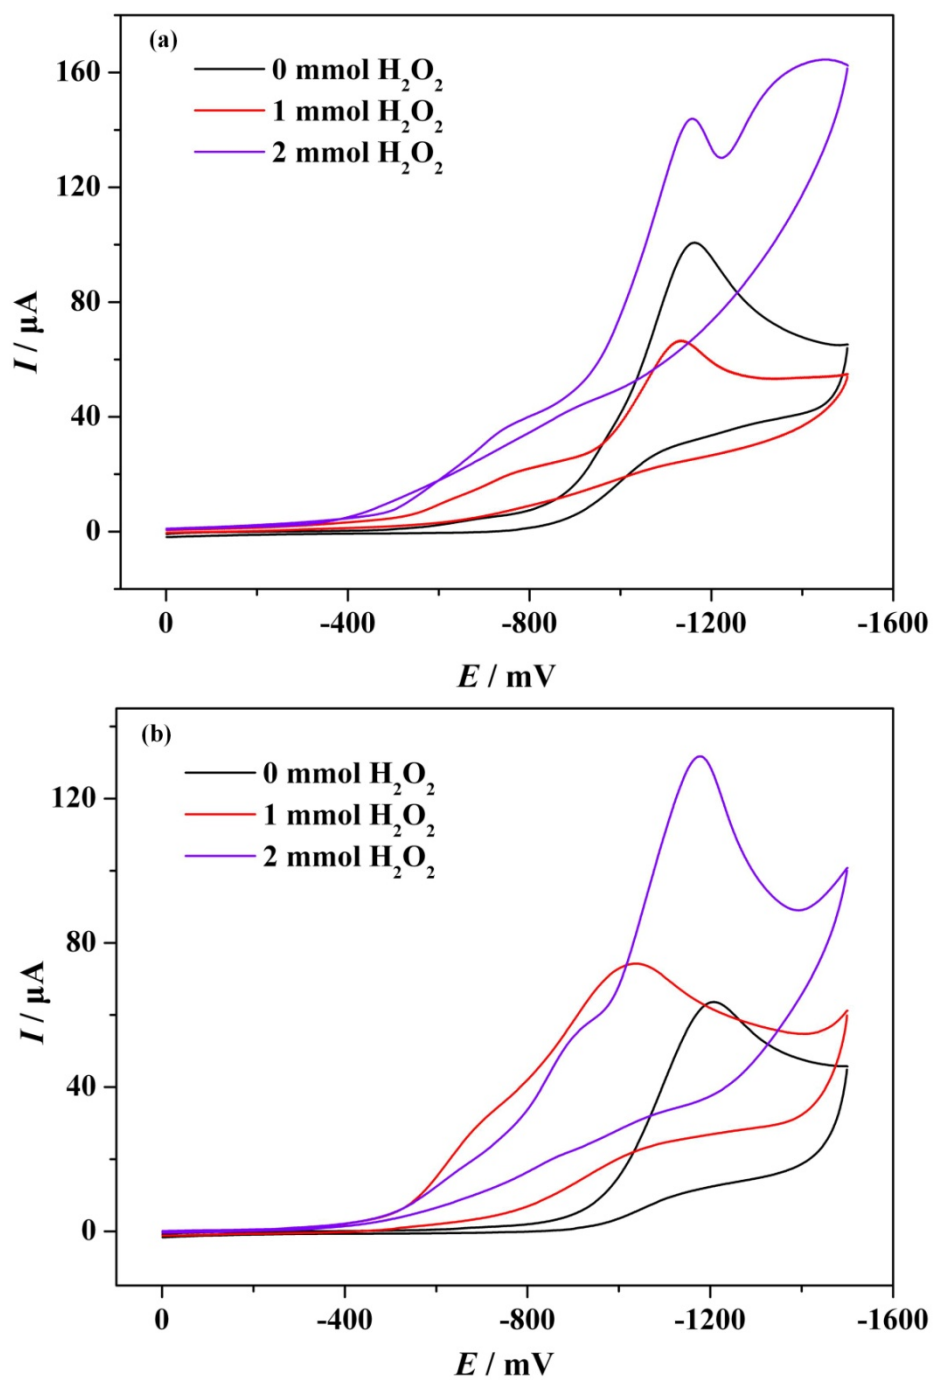

Fig. S11 Electrocatalytic activity of  $\text{PW}_9\text{-Mn}$  (a) and compound **1** (b) for reduction of  $\text{H}_2\text{O}_2$  at the scan rate of  $40 \text{ mV s}^{-1}$

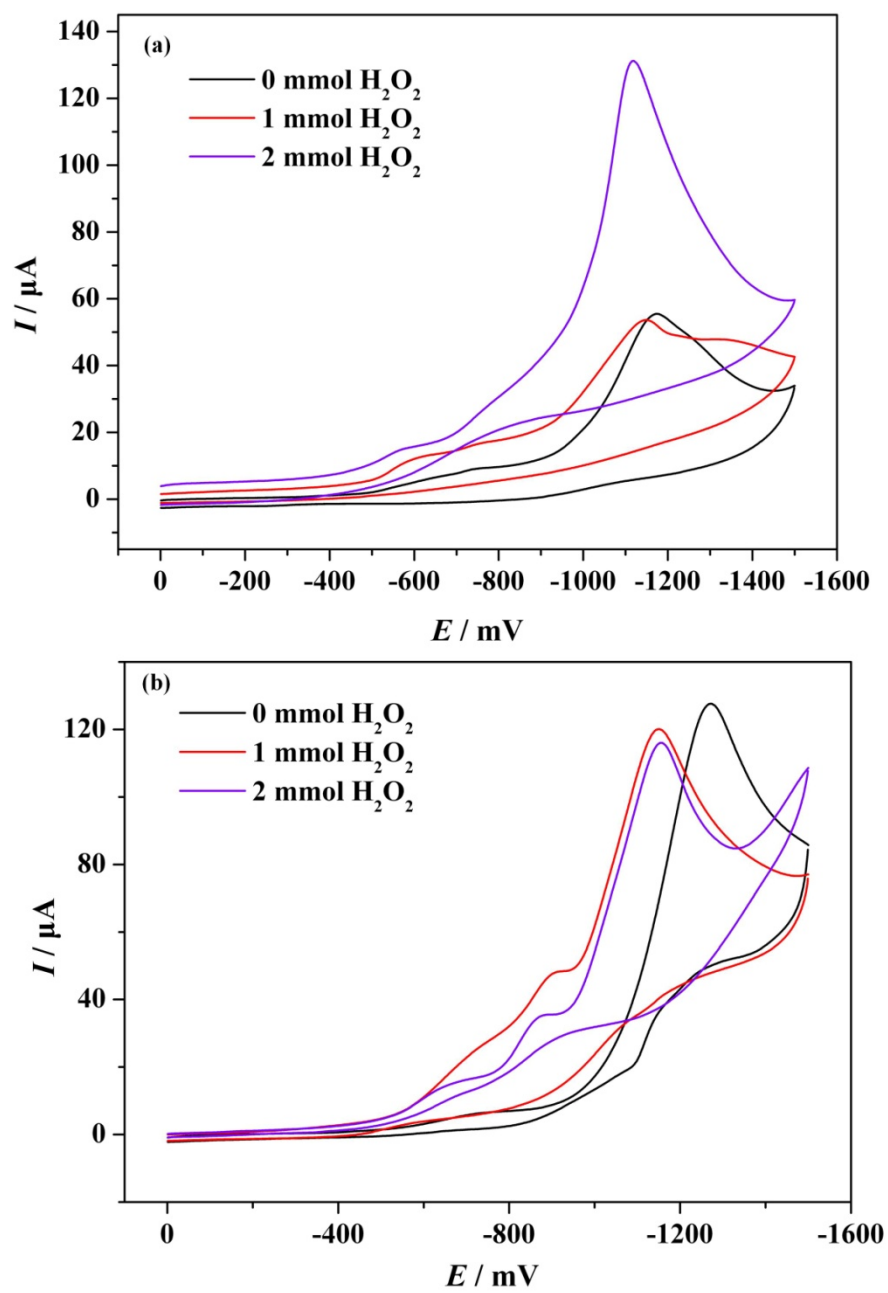

**Fig. S12** Electrocatalytic activity of  $\text{PW}_9\text{-Zn}$  (a) and compound **2** (b) for reduction of  $\text{H}_2\text{O}_2$  at the scan rate of  $40 \text{ mV s}^{-1}$

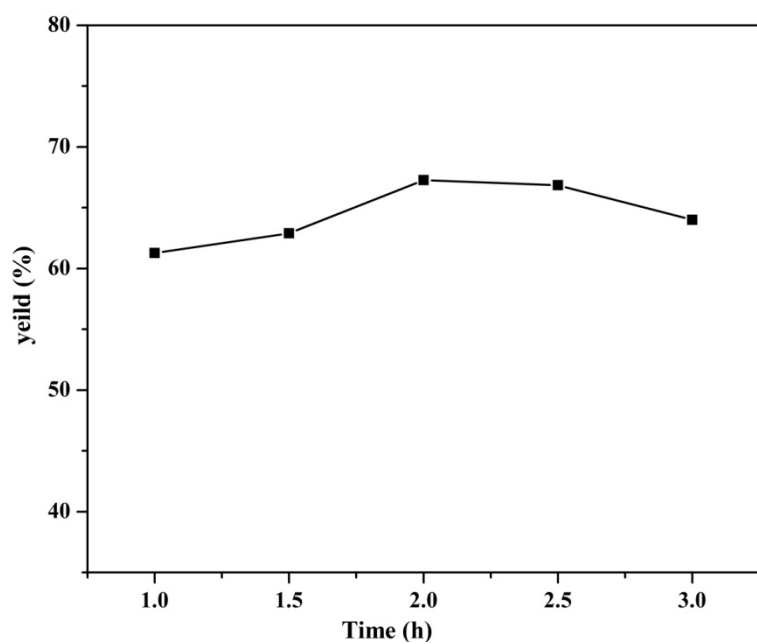

**Fig. S13** Effect of reaction time on cyclohexanone yield. Cyclohexanol to  $\text{H}_2\text{O}_2$  molar ratio, 1:2.2; catalyst ( $\text{PW}_9\text{-Zn}$ , based on W) to cyclohexanol molar ratio, 1:200; reaction temperature,  $80^\circ\text{C}$ ; acetonitrile, 10 mL

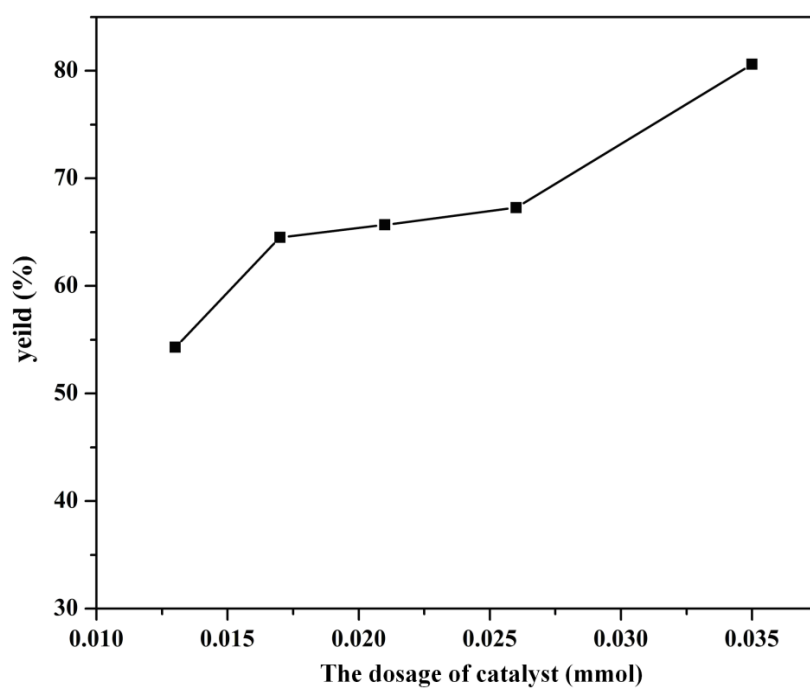

**Fig. S14** Effect of  $\text{PW}_9\text{-Zn}$  amount (based on W) on cyclohexanone yield. Cyclohexanol to  $\text{H}_2\text{O}_2$  molar ratio, 1:2.2; reaction time, 2 h; reaction temperature,  $80^\circ\text{C}$ ; acetonitrile, 10 mL

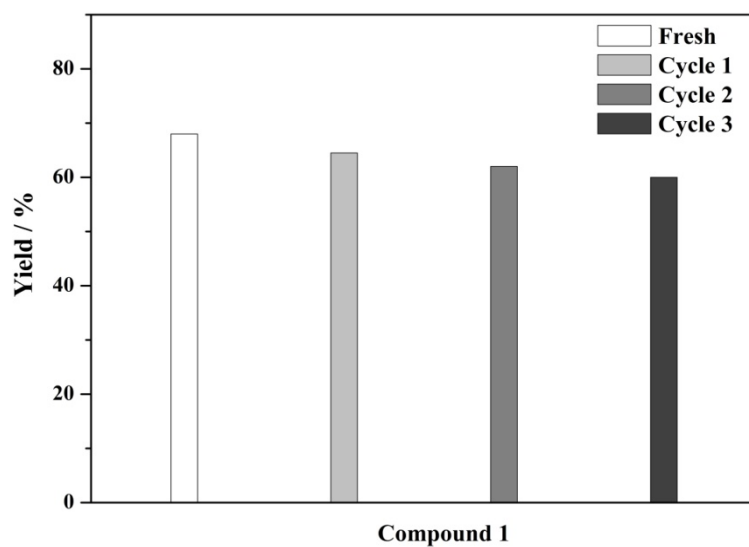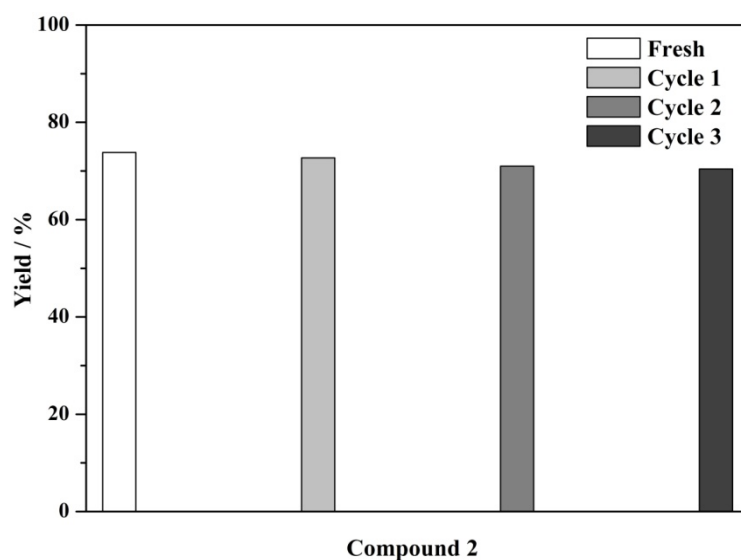

**Fig. S15** The catalytic activities of **1** and **2** used four cycles. The catalysts were recovered by simple filtration without any treatment. Cyclohexanol to H<sub>2</sub>O<sub>2</sub> molar ratio, 1:2.2; catalyst (based on W) to cyclohexanol molar ratio, 1:150; reaction time, 2 h; reaction temperature, 80°C; acetonitrile, 10 mL

**Table S3** Catalytic performance of various catalysts for the oxidation of cyclohexanol to cyclohexanone with H<sub>2</sub>O<sub>2</sub> (catalyst (based on W) to cyclohexanol molar ratio, 1:150)

| Entry | Catalyst                                                             | H <sub>2</sub> O <sub>2</sub> (equiv.) | Solvent | Solubility | Temperature (°C) | Time (min) | Isolated yield (%) |
|-------|----------------------------------------------------------------------|----------------------------------------|---------|------------|------------------|------------|--------------------|
| 1     | Compound <b>1</b>                                                    | 2.2                                    | MeCN    | soluble    | 80               | 120        | 68.2               |
| 2     | Compound <b>2</b>                                                    | 2.2                                    | MeCN    | soluble    | 80               | 120        | 73.8               |
| 3     | <b>PW<sub>9</sub>-Mn</b>                                             | 2.2                                    | MeCN    | soluble    | 80               | 120        | 46.8               |
| 4     | <b>PW<sub>9</sub>-Zn</b>                                             | 2.2                                    | MeCN    | soluble    | 80               | 120        | 80.7               |
| 5     | Cl <sub>3</sub> Sn(CH <sub>2</sub> ) <sub>2</sub> COOCH <sub>3</sub> | 2.2                                    | MeCN    | soluble    | 80               | 120        | 6.02               |
